# Supplementary material
Source: publisher site journal article supplement (http://www.spandidos-publications.com/1934/downloadSupplementary)

Figure S1. CDC42 and CCND1 expression levels in transfected OVCAR-3 cells. (A) Relative expression of CDC42 in OVCAR-3 cells transfected with pcDNA 3.1-vector or pcDNA 3.1-CDC42. (B) Relative expression of CCND1 in OVCAR-3 cells transfected with pcDNA 3.1-vector or pcDNA 3.1-CCND1. (C) Relative expression of CDC42 in OVCAR-3 cells transfected with siRNA-NC or siRNA-CDC42. (D) Relative expression of CCND1 in OVCAR-3 cells transfected with siRNA-NC or siRNA-CCND1. Data were analyzed using one-way ANOVA. \*\* $P < 0.01$ . siRNA, short interfering RNA; CDC42, Cell division cycle 42; CCND1, cyclin D1; NC, negative control.

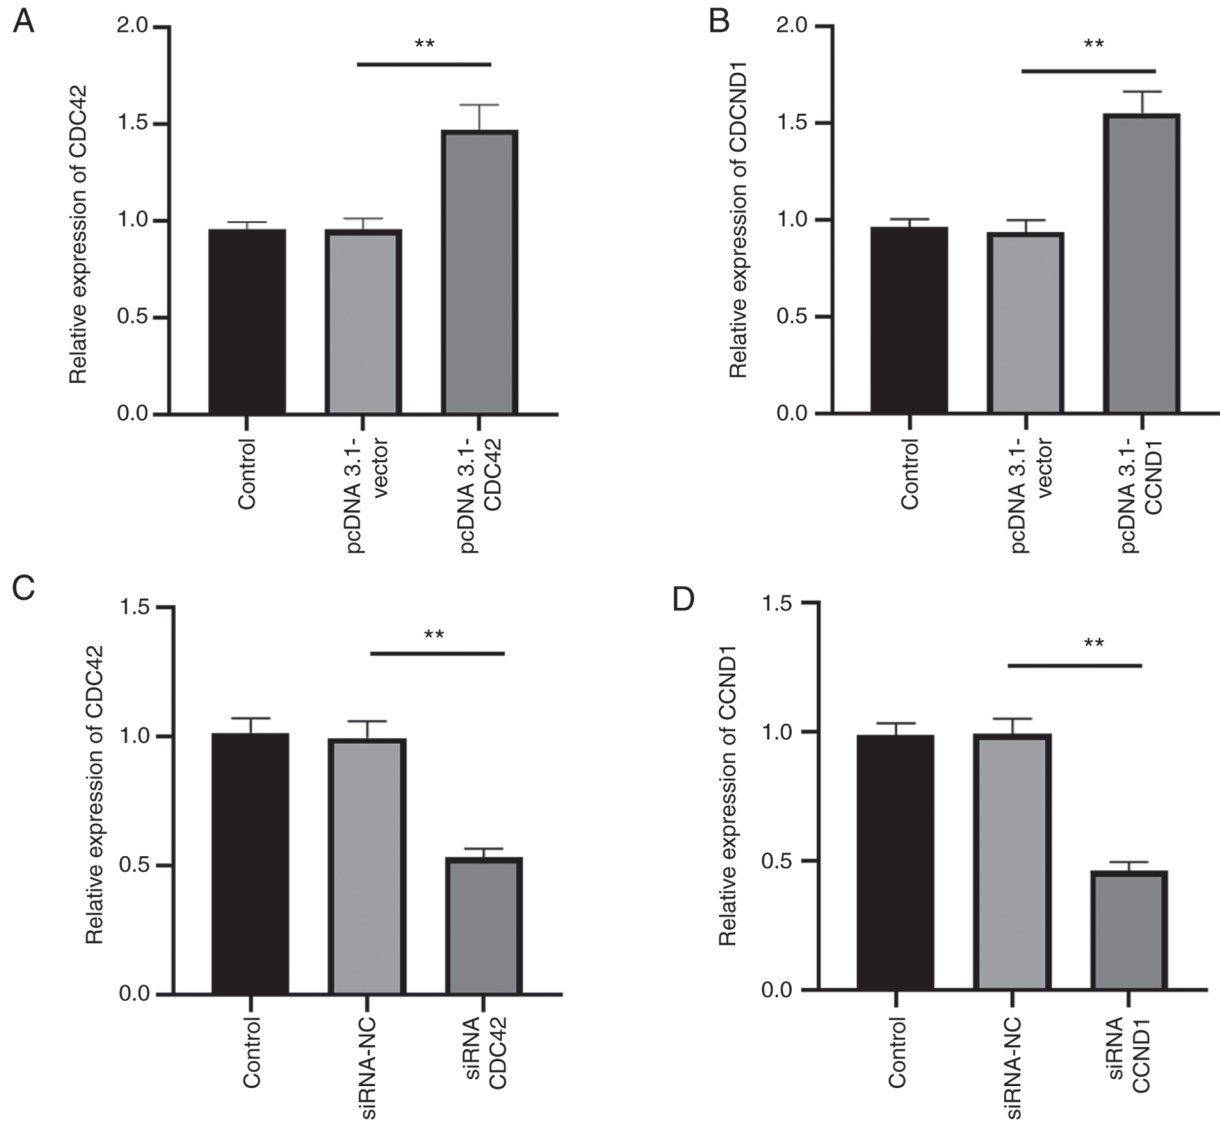

Supplement: Supplementary file 1 [file downloadSupplementary]
